# Supplementary material for: A field-based modeling study on ecological characterization of hourly host-seeking behavior and its associated climatic variables in Aedes albopictus
Source: PubMed Central journal article supplement (PMC6791010; doi:10.1186/s13071-019-3715-1), 2019-10-14
Supplement: 13071_2019_3715_MOESM3_ESM.pdf [file 13071_2019_3715_MOESM3_ESM.pdf]

**Table S1. The fixed values of other variables.**

| Variable                                                  | Value          |
|-----------------------------------------------------------|----------------|
| Time points within a day                                  | 18:00          |
| Month                                                     | June           |
| Temperature (°C)                                          | 25.2           |
| Relative humidity (%)                                     | 82             |
| Whether the time point was in the daytime or at nighttime | In the daytime |
| Wind speed (m/s)                                          | 0.4            |
