# Supplementary material for: A field-based modeling study on ecological characterization of hourly host-seeking behavior and its associated climatic variables in Aedes albopictus
Source: PubMed Central journal article supplement (PMC6791010; doi:10.1186/s13071-019-3715-1), 2019-10-14
Supplement: 13071_2019_3715_MOESM4_ESM.pdf [file 13071_2019_3715_MOESM4_ESM.pdf]

**Table S2. Adult mosquitoes collected by multi-month field investigations from November 2016 to November 2017**

| Month and year | Female <i>Ae. albopictus</i> |           | Male <i>Ae. albopictus</i> |           | Female <i>Cx. quinquefasciatus</i> |           | Male <i>Cx. quinquefasciatus</i> |           | Total |
|----------------|------------------------------|-----------|----------------------------|-----------|------------------------------------|-----------|----------------------------------|-----------|-------|
|                | Daytime                      | Nighttime | Daytime                    | Nighttime | Daytime                            | Nighttime | Daytime                          | Nighttime |       |
| 2016-Nov       | 222                          | 17        | 67                         | 0         | 3                                  | 40        | 2                                | 24        | 375   |
| 2016-Dec       | 10                           | 1         | 1                          | 0         | 2                                  | 26        | 2                                | 6         | 48    |
| 2017-Jan       | 14                           | 3         | 2                          | 0         | 44                                 | 199       | 26                               | 37        | 325   |
| 2017-Feb       | 3                            | 0         | 0                          | 0         | 3                                  | 43        | 21                               | 13        | 83    |
| 2017-Mar       | 2                            | 1         | 0                          | 0         | 10                                 | 13        | 1                                | 0         | 27    |
| 2017-Apr       | 45                           | 10        | 33                         | 4         | 5                                  | 19        | 1                                | 0         | 123   |
| 2017-May       | 180                          | 61        | 101                        | 11        | 2                                  | 12        | 1                                | 0         | 368   |
| 2017-Jun       | 220                          | 92        | 149                        | 26        | 2                                  | 47        | 1                                | 0         | 537   |
| 2017-Jul       | 118                          | 33        | 137                        | 34        | 0                                  | 39        | 1                                | 3         | 365   |
| 2017-Aug       | 28                           | 31        | 33                         | 15        | 10                                 | 26        | 0                                | 3         | 146   |
| 2017-Sep       | 44                           | 24        | 43                         | 5         | 1                                  | 22        | 0                                | 4         | 143   |
| 2017-Oct       | 60                           | 41        | 49                         | 24        | 5                                  | 17        | 0                                | 2         | 198   |
| 2017-Nov       | 12                           | 9         | 3                          | 1         | 1                                  | 72        | 2                                | 14        | 114   |
| Total          | 958                          | 329       | 618                        | 120       | 88                                 | 575       | 58                               | 106       | 2852  |
