# Supplementary material for: A field-based modeling study on ecological characterization of hourly host-seeking behavior and its associated climatic variables in Aedes albopictus
Source: PubMed Central journal article supplement (PMC6791010; doi:10.1186/s13071-019-3715-1), 2019-10-14
Supplement: 13071_2019_3715_MOESM5_ESM.pdf [file 13071_2019_3715_MOESM5_ESM.pdf]

**Table S3. Adult mosquitoes collected by multi-site field investigations during June-July 2018**

| Area      | Female <i>Ae. albopictus</i> |           | Male <i>Ae. albopictus</i> |           | Female <i>Cx. quinquefasciatus</i> |           | Male <i>Cx. quinquefasciatus</i> |           | Female <i>Ar. subalbatus</i> |           | Total |
|-----------|------------------------------|-----------|----------------------------|-----------|------------------------------------|-----------|----------------------------------|-----------|------------------------------|-----------|-------|
|           | Daytime                      | Nighttime | Daytime                    | Nighttime | Daytime                            | Nighttime | Daytime                          | Nighttime | Daytime                      | Nighttime |       |
| Main Site | 487                          | 108       | 550                        | 142       | 16                                 | 70        | 6                                | 10        | 0                            | 0         | 1389  |
| Site A    | 543                          | 233       | 268                        | 130       | 32                                 | 96        | 6                                | 14        | 0                            | 0         | 1322  |
| Site B    | 160                          | 144       | 214                        | 38        | 22                                 | 38        | 4                                | 2         | 18                           | 6         | 646   |
| Site C    | 152                          | 115       | 157                        | 103       | 2                                  | 40        | 6                                | 2         | 4                            | 0         | 581   |
| Total     | 1342                         | 600       | 1189                       | 413       | 72                                 | 244       | 22                               | 28        | 22                           | 6         | 3938  |
