# Supplementary material for: A field-based modeling study on ecological characterization of hourly host-seeking behavior and its associated climatic variables in Aedes albopictus
Source: PubMed Central journal article supplement (PMC6791010; doi:10.1186/s13071-019-3715-1), 2019-10-14
Supplement: 13071_2019_3715_MOESM6_ESM.pdf [file 13071_2019_3715_MOESM6_ESM.pdf]

**Table S4a. The predicted value for the multi-month mosquito density of *Ae. albopictus* during both the day and night**

|           | Female <i>Ae. albopictus</i> |              | Male <i>Ae. albopictus</i> |             |
|-----------|------------------------------|--------------|----------------------------|-------------|
|           | Density                      | 95% CrI      | Density                    | 95% CrI     |
| Daytime   | 24.4                         | (11.9, 50.0) | 6.5                        | (2.3, 19.6) |
| Nighttime | 5.5                          | (2.4, 12.6)  | 0.7                        | (0.2, 2.6)  |

Abbreviations: 95% CrI, 95% credible interval; Density, mosquito number per person per hour.

**Table S4b. The predicted value for the multi-site mosquito density of *Ae. albopictus* during both the day and night**

|           | Female <i>Ae. albopictus</i> |              | Male <i>Ae. albopictus</i> |               |
|-----------|------------------------------|--------------|----------------------------|---------------|
|           | Density                      | 95% CrI      | Density                    | 95% CrI       |
| Daytime   | 34.0                         | (7.7, 167.2) | 66.0                       | (12.9, 385.9) |
| Nighttime | 16.5                         | (3.6, 88.1)  | 16.1                       | (2.9, 101.2)  |

Abbreviations: 95% CrI, 95% credible interval; Density, mosquito number per person per hour.
