# Supplementary material for: A field-based modeling study on ecological characterization of hourly host-seeking behavior and its associated climatic variables in Aedes albopictus
Source: PubMed Central journal article supplement (PMC6791010; doi:10.1186/s13071-019-3715-1), 2019-10-14

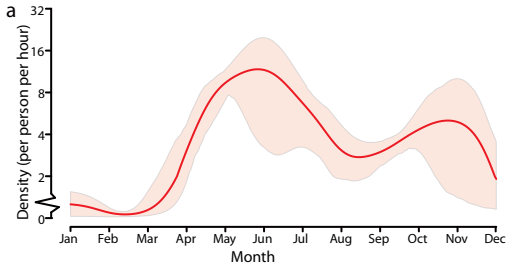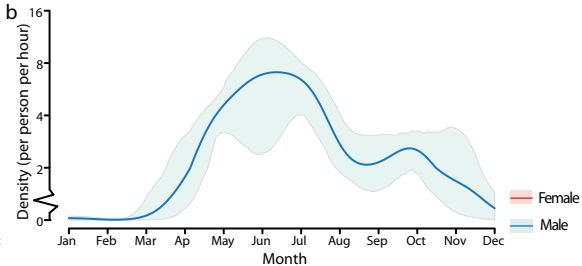

Supplement: 13071_2019_3715_MOESM7_ESM.pdf [file 13071_2019_3715_MOESM7_ESM.pdf]
