# Supplementary material for: A field-based modeling study on ecological characterization of hourly host-seeking behavior and its associated climatic variables in Aedes albopictus
Source: PubMed Central journal article supplement (PMC6791010; doi:10.1186/s13071-019-3715-1), 2019-10-14
Supplement: 13071_2019_3715_MOESM8_ESM.pdf [file 13071_2019_3715_MOESM8_ESM.pdf]

**Table S5a. Values of the Watanabe-Akaike information criterion (WAIC) for models used for the assessment of potential influential factors (without illuminance) of female *Ae. albopictus* for the period from November 2016 to November 2017.**

| Intercept | Month | Included terms |      |          |      |      |      |      |      |        |      |      |      |      |      |        |          |      |      | WAIC |      |      |                |
|-----------|-------|----------------|------|----------|------|------|------|------|------|--------|------|------|------|------|------|--------|----------|------|------|------|------|------|----------------|
|           |       | ns(TPWAD)      |      | ns(Temp) |      |      |      |      |      | ns(RH) |      |      |      |      |      | d_or_n | ns(Wind) |      |      |      |      |      |                |
|           |       | df=4           | df=6 | df=1     | df=2 | df=3 | df=4 | df=5 | df=6 | df=1   | df=2 | df=3 | df=4 | df=5 | df=6 |        | df=1     | df=2 | df=3 |      | df=4 | df=5 | df=6           |
| ✓         | ✓     | ✓              |      |          |      |      |      |      |      |        |      |      |      |      |      |        |          |      |      |      |      |      | 2476.75        |
| ✓         | ✓     |                | ✓    |          |      |      |      |      |      |        |      |      |      |      |      |        |          |      |      |      |      |      | 2468.72        |
| ✓         | ✓     | ✓              |      | ✓        |      |      |      |      |      |        |      |      |      |      |      |        |          |      |      |      |      |      | 2479.30        |
| ✓         | ✓     | ✓              |      |          | ✓    |      |      |      |      |        |      |      |      |      |      |        |          |      |      |      |      |      | 2381.97        |
| ✓         | ✓     | ✓              |      |          |      | ✓    |      |      |      |        |      |      |      |      |      |        |          |      |      |      |      |      | 2385.42        |
| ✓         | ✓     | ✓              |      |          |      |      | ✓    |      |      |        |      |      |      |      |      |        |          |      |      |      |      |      | 2386.50        |
| ✓         | ✓     | ✓              |      |          |      |      |      | ✓    |      |        |      |      |      |      |      |        |          |      |      |      |      |      | 2388.87        |
| ✓         | ✓     | ✓              |      |          |      |      |      |      | ✓    |        |      |      |      |      |      |        |          |      |      |      |      |      | 2391.65        |
| ✓         | ✓     | ✓              |      |          |      |      |      |      |      | ✓      |      |      |      |      |      |        |          |      |      |      |      |      | 2451.59        |
| ✓         | ✓     | ✓              |      |          |      |      |      |      |      |        | ✓    |      |      |      |      |        |          |      |      |      |      |      | 2454.13        |
| ✓         | ✓     | ✓              |      |          |      |      |      |      |      |        |      | ✓    |      |      |      |        |          |      |      |      |      |      | 2453.98        |
| ✓         | ✓     | ✓              |      |          |      |      |      |      |      |        |      |      | ✓    |      |      |        |          |      |      |      |      |      | 2455.17        |
| ✓         | ✓     | ✓              |      |          |      |      |      |      |      |        |      |      |      | ✓    |      |        |          |      |      |      |      |      | 2439.66        |
| ✓         | ✓     | ✓              |      |          |      |      |      |      |      |        |      |      |      |      | ✓    |        |          |      |      |      |      |      | 2433.45        |
| ✓         | ✓     | ✓              |      |          |      |      |      |      |      |        |      |      |      |      |      | ✓      |          |      |      |      |      |      | 2454.28        |
| ✓         | ✓     | ✓              |      |          |      |      |      |      |      |        |      |      |      |      |      |        | ✓        |      |      |      |      |      | 2468.04        |
| ✓         | ✓     | ✓              |      |          |      |      |      |      |      |        |      |      |      |      |      |        |          | ✓    |      |      |      |      | 2467.21        |
| ✓         | ✓     | ✓              |      |          |      |      |      |      |      |        |      |      |      |      |      |        |          |      | ✓    |      |      |      | 2467.91        |
| ✓         | ✓     | ✓              |      |          |      |      |      |      |      |        |      |      |      |      |      |        |          |      |      | ✓    |      |      | 2455.54        |
| ✓         | ✓     | ✓              |      |          |      |      |      |      |      |        |      |      |      |      |      |        |          |      |      |      | ✓    |      | 2454.94        |
| ✓         | ✓     | ✓              |      |          |      |      |      |      |      |        |      |      |      |      |      |        |          |      |      |      |      | ✓    | 2455.57        |
| ✓         | ✓     | ✓              |      |          |      |      |      |      |      |        |      |      |      |      |      |        |          |      |      |      |      |      | 2378.66        |
| ✓         | ✓     | ✓              |      |          |      |      |      |      |      |        |      |      |      |      |      |        |          |      |      |      |      |      | 2380.82        |
| ✓         | ✓     | ✓              |      |          |      |      |      |      |      |        |      |      |      |      |      |        |          |      |      |      |      |      | 2382.42        |
| ✓         | ✓     | ✓              |      |          |      |      |      |      |      |        |      |      |      |      |      |        |          |      |      |      |      |      | 2383.99        |
| ✓         | ✓     | ✓              |      |          |      |      |      |      |      |        |      |      |      |      |      |        |          |      |      |      |      |      | 2376.05        |
| ✓         | ✓     | ✓              |      |          |      |      |      |      |      |        |      |      |      |      |      |        |          |      |      |      |      |      | 2369.54        |
| ✓         | ✓     | ✓              |      |          |      |      |      |      |      |        |      |      |      |      |      |        |          |      |      |      |      |      | 2350.90        |
| ✓         | ✓     | ✓              |      |          |      |      |      |      |      |        |      |      |      |      |      |        |          |      |      |      |      |      | 2352.17        |
| ✓         | ✓     | ✓              |      |          |      |      |      |      |      |        |      |      |      |      |      |        |          |      |      |      |      |      | 2351.50        |
| ✓         | ✓     | ✓              |      |          |      |      |      |      |      |        |      |      |      |      |      |        |          |      |      |      |      |      | 2351.68        |
| ✓         | ✓     | ✓              |      |          |      |      |      |      |      |        |      |      |      |      |      |        |          |      |      |      |      |      | <b>2334.14</b> |
| ✓         | ✓     | ✓              |      |          |      |      |      |      |      |        |      |      |      |      |      |        |          |      |      |      |      |      | 2333.66        |
| ✓         | ✓     | ✓              |      |          |      |      |      |      |      |        |      |      |      |      |      |        |          |      |      |      |      |      | 2334.64        |

Month represents a categorical variable indicating month. ns(.) means natural cubic spline function of a variable. TPWAD represents the time point within a day. Temp, RH, and Wind represent temperature, relative humidity, and wind speed, respectively. df means degree of freedom. d\_or\_n represents whether the time point is in the daytime or at nighttime. Note. The final model was in bold.

**Table S5b. Values of the Watanabe-Akaike information criterion (WAIC) for models used for the assessment of potential influential factors (with illuminance) of female *Ae. albopictus* for the period from between November 2016 to November 2017.**

| Intercept | Month | ns(TPWAD, df=4) | Included terms |      |      |      |      |      |          |      |      |      |      | WAIC |   |         |                |
|-----------|-------|-----------------|----------------|------|------|------|------|------|----------|------|------|------|------|------|---|---------|----------------|
|           |       |                 | ns(log(Illum)) |      |      |      |      |      | ns(Wind) |      |      |      |      |      |   |         |                |
|           |       |                 | df=2           | df=3 | df=4 | df=5 | df=6 | df=1 | df=2     | df=3 | df=4 | df=5 | df=6 |      |   |         |                |
| ✓         | ✓     | ✓               | ✓              |      |      |      |      |      |          |      |      |      |      |      |   | 2456.82 |                |
| ✓         | ✓     | ✓               |                | ✓    |      |      |      |      |          |      |      |      |      |      |   |         | 2420.02        |
| ✓         | ✓     | ✓               |                |      | ✓    |      |      |      |          |      |      |      |      |      |   |         | 2410.93        |
| ✓         | ✓     | ✓               |                |      |      | ✓    |      |      |          |      |      |      |      |      |   |         | 2414.91        |
| ✓         | ✓     | ✓               |                |      |      |      |      | ✓    |          |      |      |      |      |      |   |         | 2412.93        |
| ✓         | ✓     | ✓               |                |      |      |      |      |      | ✓        |      |      |      |      |      |   |         | 2410.47        |
| ✓         | ✓     | ✓               |                | ✓    |      |      |      |      |          | ✓    |      |      |      |      |   |         | 2409.33        |
| ✓         | ✓     | ✓               |                | ✓    |      |      |      |      |          |      | ✓    |      |      |      |   |         | 2409.47        |
| ✓         | ✓     | ✓               |                | ✓    |      |      |      |      |          |      |      | ✓    |      |      |   |         | <b>2397.81</b> |
| ✓         | ✓     | ✓               |                | ✓    |      |      |      |      |          |      |      |      | ✓    |      |   |         | 2398.36        |
| ✓         | ✓     | ✓               |                | ✓    |      |      |      |      |          |      |      |      |      |      | ✓ |         | 2400.08        |

Month represents a categorical variable indicating month. ns(.) means natural cubic spline function of a variable. TPWAD represents the time point within a day. df means degree of freedom. log(Illum+0.001) means the log-transformation of (Illum + 0.001).

Note. The final model was in bold.

**Table S5c. Values of the Watanabe-Akaike information criterion (WAIC) for models used for the assessment of potential influential factors (without illuminance) of male *Ae. albopictus* for the period from November 2016 to November 2017.**

| Intercept | Month | Included terms |      |          |      |      |      |      |      |        |      |      |      |      |      |          |      |      |      |      |      | WAIC |                |
|-----------|-------|----------------|------|----------|------|------|------|------|------|--------|------|------|------|------|------|----------|------|------|------|------|------|------|----------------|
|           |       | ns(TPWAD)      |      | ns(Temp) |      |      |      |      |      | ns(RH) |      |      |      |      |      | ns(Wind) |      |      |      |      |      |      |                |
|           |       | df=4           | df=6 | df=1     | df=2 | df=3 | df=4 | df=5 | df=6 | df=1   | df=2 | df=3 | df=4 | df=5 | df=6 | d or n   | df=1 | df=2 | df=3 | df=4 | df=5 |      | df=6           |
| ✓         | ✓     | ✓              |      |          |      |      |      |      |      |        |      |      |      |      |      |          |      |      |      |      |      |      | 1641.24        |
| ✓         | ✓     |                | ✓    |          |      |      |      |      |      |        |      |      |      |      |      |          |      |      |      |      |      |      | 1615.56        |
| ✓         | ✓     |                | ✓    | ✓        |      |      |      |      |      |        |      |      |      |      |      |          |      |      |      |      |      |      | 1618.93        |
| ✓         | ✓     |                | ✓    |          | ✓    |      |      |      |      |        |      |      |      |      |      |          |      |      |      |      |      |      | 1542.41        |
| ✓         | ✓     |                | ✓    |          |      | ✓    |      |      |      |        |      |      |      |      |      |          |      |      |      |      |      |      | 1542.95        |
| ✓         | ✓     |                | ✓    |          |      |      | ✓    |      |      |        |      |      |      |      |      |          |      |      |      |      |      |      | 1544.94        |
| ✓         | ✓     |                | ✓    |          |      |      |      | ✓    |      |        |      |      |      |      |      |          |      |      |      |      |      |      | 1546.99        |
| ✓         | ✓     |                | ✓    |          |      |      |      |      | ✓    |        |      |      |      |      |      |          |      |      |      |      |      |      | 1546.34        |
| ✓         | ✓     |                | ✓    |          |      |      |      |      |      | ✓      |      |      |      |      |      |          |      |      |      |      |      |      | 1599.56        |
| ✓         | ✓     |                | ✓    |          |      |      |      |      |      |        | ✓    |      |      |      |      |          |      |      |      |      |      |      | 1594.54        |
| ✓         | ✓     |                | ✓    |          |      |      |      |      |      |        |      | ✓    |      |      |      |          |      |      |      |      |      |      | 1596.11        |
| ✓         | ✓     |                | ✓    |          |      |      |      |      |      |        |      |      | ✓    |      |      |          |      |      |      |      |      |      | 1597.99        |
| ✓         | ✓     |                | ✓    |          |      |      |      |      |      |        |      |      |      | ✓    |      |          |      |      |      |      |      |      | 1594.08        |
| ✓         | ✓     |                | ✓    |          |      |      |      |      |      |        |      |      |      |      | ✓    |          |      |      |      |      |      |      | 1596.56        |
| ✓         | ✓     |                | ✓    |          |      |      |      |      |      |        |      |      |      |      |      | ✓        |      |      |      |      |      |      | 1601.58        |
| ✓         | ✓     |                | ✓    |          |      |      |      |      |      |        |      |      |      |      |      |          | ✓    |      |      |      |      |      | 1611.65        |
| ✓         | ✓     |                | ✓    |          |      |      |      |      |      |        |      |      |      |      |      |          |      | ✓    |      |      |      |      | 1613.15        |
| ✓         | ✓     |                | ✓    |          |      |      |      |      |      |        |      |      |      |      |      |          |      |      | ✓    |      |      |      | 1612.90        |
| ✓         | ✓     |                | ✓    |          |      |      |      |      |      |        |      |      |      |      |      |          |      |      |      | ✓    |      |      | 1612.80        |
| ✓         | ✓     |                | ✓    |          |      |      |      |      |      |        |      |      |      |      |      |          |      |      |      |      | ✓    |      | 1614.62        |
| ✓         | ✓     |                | ✓    |          |      |      |      |      |      |        |      |      |      |      |      |          |      |      |      |      |      | ✓    | 1614.54        |
| ✓         | ✓     |                | ✓    |          |      |      |      |      |      | ✓      |      |      |      |      |      |          |      |      |      |      |      |      | 1538.15        |
| ✓         | ✓     |                | ✓    |          |      |      |      |      |      |        | ✓    |      |      |      |      |          |      |      |      |      |      |      | 1539.45        |
| ✓         | ✓     |                | ✓    |          |      |      |      |      |      |        |      | ✓    |      |      |      |          |      |      |      |      |      |      | 1541.19        |
| ✓         | ✓     |                | ✓    |          |      |      |      |      |      |        |      |      | ✓    |      |      |          |      |      |      |      |      |      | 1544.30        |
| ✓         | ✓     |                | ✓    |          |      |      |      |      |      |        |      |      |      | ✓    |      |          |      |      |      |      |      |      | 1542.46        |
| ✓         | ✓     |                | ✓    |          |      |      |      |      |      |        |      |      |      |      | ✓    |          |      |      |      |      |      |      | 1543.74        |
| ✓         | ✓     |                | ✓    |          |      |      |      |      |      | ✓      |      |      |      |      |      | ✓        |      |      |      |      |      |      | <b>1520.58</b> |
| ✓         | ✓     |                | ✓    |          |      |      |      |      |      | ✓      |      |      |      |      |      | ✓        |      |      |      |      |      |      | 1522.07        |
| ✓         | ✓     |                | ✓    |          |      |      |      |      |      | ✓      |      |      |      |      |      | ✓        |      |      |      |      |      |      | 1522.51        |
| ✓         | ✓     |                | ✓    |          |      |      |      |      |      | ✓      |      |      |      |      |      | ✓        |      |      |      |      |      |      | 1521.85        |
| ✓         | ✓     |                | ✓    |          |      |      |      |      |      | ✓      |      |      |      |      |      | ✓        |      |      |      |      |      |      | 1522.41        |
| ✓         | ✓     |                | ✓    |          |      |      |      |      |      | ✓      |      |      |      |      |      | ✓        |      |      |      |      |      |      | 1524.38        |
| ✓         | ✓     |                | ✓    |          |      |      |      |      |      | ✓      |      |      |      |      |      | ✓        |      |      |      |      |      | ✓    | 1524.74        |

Month represents a categorical variable indicating month. ns(.) means natural cubic spline function of a variable. TPWAD represents the time point within a day. Temp, RH, and Wind represent temperature, relative humidity, and wind speed, respectively. df means degree of freedom. d\_or\_n represents whether the time point is in the daytime or at nighttime.

Note. The final model was in bold.

**Table S5d. Values of the Watanabe-Akaike information criterion (WAIC) for models used for the assessment of potential influential factors (with illuminance) of male *Ae. Albopictus* for the period from November 2016 to November 2017.**

| Intercept | Month | ns(TPWAD, <i>df</i> =6) | Included terms          |              |              |              |              |                   |              |              |              |              |              | WAIC |  |         |                |
|-----------|-------|-------------------------|-------------------------|--------------|--------------|--------------|--------------|-------------------|--------------|--------------|--------------|--------------|--------------|------|--|---------|----------------|
|           |       |                         | ns(log( <i>Illum</i> )) |              |              |              |              | ns( <i>Wind</i> ) |              |              |              |              |              |      |  |         |                |
|           |       |                         | <i>df</i> =2            | <i>df</i> =3 | <i>df</i> =4 | <i>df</i> =5 | <i>df</i> =6 | <i>df</i> =1      | <i>df</i> =2 | <i>df</i> =3 | <i>df</i> =4 | <i>df</i> =5 | <i>df</i> =6 |      |  |         |                |
| ✓         | ✓     | ✓                       | ✓                       |              |              |              |              |                   |              |              |              |              |              |      |  | 1594.09 |                |
| ✓         | ✓     | ✓                       |                         | ✓            |              |              |              |                   |              |              |              |              |              |      |  |         | <b>1574.23</b> |
| ✓         | ✓     | ✓                       |                         |              | ✓            |              |              |                   |              |              |              |              |              |      |  |         | 1573.75        |
| ✓         | ✓     | ✓                       |                         |              |              | ✓            |              |                   |              |              |              |              |              |      |  |         | 1571.36        |
| ✓         | ✓     | ✓                       |                         |              |              |              | ✓            |                   |              |              |              |              |              |      |  |         | 1575.41        |
| ✓         | ✓     | ✓                       |                         | ✓            |              |              |              |                   | ✓            |              |              |              |              |      |  |         | 1573.34        |
| ✓         | ✓     | ✓                       |                         | ✓            |              |              |              |                   |              | ✓            |              |              |              |      |  |         | 1575.10        |
| ✓         | ✓     | ✓                       |                         | ✓            |              |              |              |                   |              |              | ✓            |              |              |      |  |         | 1574.98        |
| ✓         | ✓     | ✓                       |                         | ✓            |              |              |              |                   |              |              |              | ✓            |              |      |  |         | 1575.94        |
| ✓         | ✓     | ✓                       |                         | ✓            |              |              |              |                   |              |              |              |              | ✓            |      |  |         | 1577.64        |
| ✓         | ✓     | ✓                       |                         | ✓            |              |              |              |                   |              |              |              |              |              | ✓    |  |         | 1577.76        |

*Month* represents a categorical variable indicating month. *ns*(.) means natural cubic spline function of a variable. TPWAD represents the time point within a day. *df* means degree of freedom.  $\log(Illum+0.001)$  means the log-transformation of (*Illum* + 0.001).

*Note.* The final model was in bold.
