# Supplementary material for: A field-based modeling study on ecological characterization of hourly host-seeking behavior and its associated climatic variables in Aedes albopictus
Source: PubMed Central journal article supplement (PMC6791010; doi:10.1186/s13071-019-3715-1), 2019-10-14
Supplement: 13071_2019_3715_MOESM9_ESM.pdf [file 13071_2019_3715_MOESM9_ESM.pdf]

**Table S6.  $R^2$  values for the models with time points within a day and month and different variables.**

| Variables                                             | $R^2$ (%)                    |              |                            |              |
|-------------------------------------------------------|------------------------------|--------------|----------------------------|--------------|
|                                                       | Female <i>Ae. albopictus</i> | (95% CrI)    | Male <i>Ae. albopictus</i> | (95% CrI)    |
| <i>Temp</i>                                           | 34.6                         | (23.3, 46.6) | 51.7                       | (36.1, 58.8) |
| <i>RH</i>                                             | 37.8                         | (24.2, 51.0) | 51.2                       | (34.2, 56.2) |
| <i>d_or_n</i>                                         | 37.1                         | (23.9, 50.5) | 45.3                       | (26.8, 59.1) |
| <i>Wind</i>                                           | 36.8                         | (24.3, 48.3) | -                          | -            |
| $\log(Illum+0.001)$                                   | 45.6                         | (32.2, 54.3) | 51.5                       | (35.4, 58.5) |
| <i>Temp</i> + <i>RH</i> + <i>d_or_n</i>               | -                            | -            | 58.5                       | (44.2, 64.2) |
| <i>Temp</i> + <i>RH</i> + <i>d_or_n</i> + <i>Wind</i> | 45.6                         | (34.7, 54.5) | -                          | -            |
| $\log(Illum+0.001)$ + <i>Wind</i>                     | 46.3                         | (35.0, 54.2) | -                          | -            |

Abbreviation: 95% CrI, 95% credible interval.

*Temp* means temperature. *RH* means relative humidity. *d\_or\_n* means whether the time point is in the daytime or at nighttime. *Wind* means wind speed.  $\log(Illum+0.001)$  means the log-transformation of (*Illum* + 0.001).

- means the  $R^2$  was not calculated for the model which was not fitted.
