# Supplementary material for: A field-based modeling study on ecological characterization of hourly host-seeking behavior and its associated climatic variables in Aedes albopictus
Source: PubMed Central journal article supplement (PMC6791010; doi:10.1186/s13071-019-3715-1), 2019-10-14
Supplement: 13071_2019_3715_MOESM10_ESM.pdf [file 13071_2019_3715_MOESM10_ESM.pdf]

**Table S7a. Values of the Watanabe-Akaike information criterion (WAIC) for models used for the assessment of potential influential factors (without illuminance) of female *Ae. albopictus* for the period June-July 2018.**

| Intercept | Month | Included terms |      |          |      |      |      |      |      |        |      |      |      |      |      |        |          |      |      |      |      | WAIC |         |                |
|-----------|-------|----------------|------|----------|------|------|------|------|------|--------|------|------|------|------|------|--------|----------|------|------|------|------|------|---------|----------------|
|           |       | ns(TPWAD)      |      | ns(Temp) |      |      |      |      |      | ns(RH) |      |      |      |      |      | d_or_n | ns(Wind) |      |      |      |      |      |         |                |
|           |       | df=4           | df=6 | df=1     | df=2 | df=3 | df=4 | df=5 | df=6 | df=1   | df=2 | df=3 | df=4 | df=5 | df=6 |        | df=1     | df=2 | df=3 | df=4 | df=5 |      | df=6    |                |
| ✓         | ✓     | ✓              |      |          |      |      |      |      |      |        |      |      |      |      |      |        |          |      |      |      |      |      | 2010.73 |                |
| ✓         | ✓     |                | ✓    |          |      |      |      |      |      |        |      |      |      |      |      |        |          |      |      |      |      |      | 1984.78 |                |
| ✓         | ✓     |                | ✓    | ✓        |      |      |      |      |      |        |      |      |      |      |      |        |          |      |      |      |      |      | 1953.59 |                |
| ✓         | ✓     |                | ✓    |          | ✓    |      |      |      |      |        |      |      |      |      |      |        |          |      |      |      |      |      | 1955.09 |                |
| ✓         | ✓     |                | ✓    |          |      | ✓    |      |      |      |        |      |      |      |      |      |        |          |      |      |      |      |      | 1957.72 |                |
| ✓         | ✓     |                | ✓    |          |      |      | ✓    |      |      |        |      |      |      |      |      |        |          |      |      |      |      |      | 1958.72 |                |
| ✓         | ✓     |                | ✓    |          |      |      |      | ✓    |      |        |      |      |      |      |      |        |          |      |      |      |      |      | 1960.91 |                |
| ✓         | ✓     |                | ✓    |          |      |      |      |      | ✓    |        |      |      |      |      |      |        |          |      |      |      |      |      | 1962.13 |                |
| ✓         | ✓     |                | ✓    |          |      |      |      |      |      | ✓      |      |      |      |      |      |        |          |      |      |      |      |      | 1959.70 |                |
| ✓         | ✓     |                | ✓    |          |      |      |      |      |      |        | ✓    |      |      |      |      |        |          |      |      |      |      |      | 1959.48 |                |
| ✓         | ✓     |                | ✓    |          |      |      |      |      |      |        |      | ✓    |      |      |      |        |          |      |      |      |      |      | 1962.35 |                |
| ✓         | ✓     |                | ✓    |          |      |      |      |      |      |        |      |      | ✓    |      |      |        |          |      |      |      |      |      | 1960.30 |                |
| ✓         | ✓     |                | ✓    |          |      |      |      |      |      |        |      |      |      | ✓    |      |        |          |      |      |      |      |      | 1963.61 |                |
| ✓         | ✓     |                | ✓    |          |      |      |      |      |      |        |      |      |      |      | ✓    |        |          |      |      |      |      |      | 1960.30 |                |
| ✓         | ✓     |                | ✓    |          |      |      |      |      |      |        |      |      |      |      |      | ✓      |          |      |      |      |      |      | 1955.55 |                |
| ✓         | ✓     |                | ✓    |          |      |      |      |      |      |        |      |      |      |      |      |        | ✓        |      |      |      |      |      | 1982.01 |                |
| ✓         | ✓     |                | ✓    |          |      |      |      |      |      |        |      |      |      |      |      |        |          | ✓    |      |      |      |      | 1987.28 |                |
| ✓         | ✓     |                | ✓    |          |      |      |      |      |      |        |      |      |      |      |      |        |          |      | ✓    |      |      |      | 1989.25 |                |
| ✓         | ✓     |                | ✓    |          |      |      |      |      |      |        |      |      |      |      |      |        |          |      |      | ✓    |      |      | 1988.25 |                |
| ✓         | ✓     |                | ✓    |          |      |      |      |      |      |        |      |      |      |      |      |        |          |      |      |      | ✓    |      | 1989.30 |                |
| ✓         | ✓     |                | ✓    |          |      |      |      |      |      |        |      |      |      |      |      |        |          |      |      |      |      | ✓    | 1988.94 |                |
| ✓         | ✓     |                | ✓    |          |      |      |      |      |      |        |      |      |      |      |      |        |          |      |      |      |      |      | ✓       | 1986.40        |
| ✓         | ✓     |                | ✓    |          |      |      |      |      |      | ✓      |      |      |      |      |      |        |          |      |      |      |      |      |         | 1955.24        |
| ✓         | ✓     |                | ✓    |          |      |      |      |      |      |        | ✓    |      |      |      |      |        |          |      |      |      |      |      |         | 1958.56        |
| ✓         | ✓     |                | ✓    |          |      |      |      |      |      |        |      | ✓    |      |      |      |        |          |      |      |      |      |      |         | 1961.59        |
| ✓         | ✓     |                | ✓    |          |      |      |      |      |      |        |      |      | ✓    |      |      |        |          |      |      |      |      |      |         | 1953.40        |
| ✓         | ✓     |                | ✓    |          |      |      |      |      |      |        |      |      |      | ✓    |      |        |          |      |      |      |      |      |         | 1957.83        |
| ✓         | ✓     |                | ✓    |          |      |      |      |      |      |        |      |      |      |      | ✓    |        |          |      |      |      |      |      |         | 1952.55        |
| ✓         | ✓     |                | ✓    |          |      |      |      |      |      |        |      |      |      |      |      | ✓      |          |      |      |      |      |      |         | <b>1951.44</b> |
| ✓         | ✓     |                | ✓    |          |      |      |      |      |      |        |      |      |      |      |      |        | ✓        |      |      |      |      |      |         | 1954.07        |
| ✓         | ✓     |                | ✓    |          |      |      |      |      |      |        |      |      |      |      |      |        |          | ✓    |      |      |      |      |         | 1951.90        |
| ✓         | ✓     |                | ✓    |          |      |      |      |      |      |        |      |      |      |      |      |        |          |      | ✓    |      |      |      |         | 1950.92        |
| ✓         | ✓     |                | ✓    |          |      |      |      |      |      |        |      |      |      |      |      |        |          |      |      | ✓    |      |      |         | 1956.94        |
| ✓         | ✓     |                | ✓    |          |      |      |      |      |      |        |      |      |      |      |      |        |          |      |      |      | ✓    |      |         | 1952.64        |
| ✓         | ✓     |                | ✓    |          |      |      |      |      |      |        |      |      |      |      |      |        |          |      |      |      |      | ✓    |         | 1949.34        |

Month represents a categorical variable indicating month. ns(.) means natural cubic spline function of a variable. TPWAD represents the time point within a day. Temp, RH, and Wind represent temperature, relative humidity, and wind speed, respectively. df means degree of freedom. d\_or\_n represents whether the time point is in the daytime or at nighttime.

Note. The final model was in bold.

**Table S7b. Values of the Watanabe-Akaike information criterion (WAIC) for models used for the assessment of potential influential factors (without illuminance) of male *Ae. albopictus* for the period June-July 2018.**

| Intercept | Month    | Included terms |      |          |      |      |      |      |      |        |      |      |      |      |      |        |          |      |      | WAIC |      |      |      |                |
|-----------|----------|----------------|------|----------|------|------|------|------|------|--------|------|------|------|------|------|--------|----------|------|------|------|------|------|------|----------------|
|           |          | ns(TPWAD)      |      | ns(Temp) |      |      |      |      |      | ns(RH) |      |      |      |      |      | d_or_n | ns(Wind) |      |      |      |      |      |      |                |
|           |          | df=4           | df=6 | df=1     | df=2 | df=3 | df=4 | df=5 | df=6 | df=1   | df=2 | df=3 | df=4 | df=5 | df=6 |        | df=1     | df=2 | df=3 |      | df=4 | df=5 | df=6 |                |
| ✓         | ✓        | ✓              |      |          |      |      |      |      |      |        |      |      |      |      |      |        |          |      |      |      |      |      |      | 1801.25        |
| ✓         | ✓        |                | ✓    |          |      |      |      |      |      |        |      |      |      |      |      |        |          |      |      |      |      |      |      | 1789.52        |
| ✓         | ✓        | ✓              |      | ✓        |      |      |      |      |      |        |      |      |      |      |      |        |          |      |      |      |      |      |      | 1746.67        |
| ✓         | ✓        | ✓              |      |          | ✓    |      |      |      |      |        |      |      |      |      |      |        |          |      |      |      |      |      |      | 1737.94        |
| ✓         | ✓        | ✓              |      |          |      | ✓    |      |      |      |        |      |      |      |      |      |        |          |      |      |      |      |      |      | 1739.64        |
| ✓         | ✓        | ✓              |      |          |      |      | ✓    |      |      |        |      |      |      |      |      |        |          |      |      |      |      |      |      | 1740.83        |
| ✓         | ✓        | ✓              |      |          |      |      |      | ✓    |      |        |      |      |      |      |      |        |          |      |      |      |      |      |      | 1742.58        |
| ✓         | ✓        | ✓              |      |          |      |      |      |      | ✓    |        |      |      |      |      |      |        |          |      |      |      |      |      |      | 1743.68        |
| ✓         | ✓        | ✓              |      |          |      |      |      |      |      | ✓      |      |      |      |      |      |        |          |      |      |      |      |      |      | 1766.22        |
| ✓         | ✓        | ✓              |      |          |      |      |      |      |      |        | ✓    |      |      |      |      |        |          |      |      |      |      |      |      | 1750.87        |
| ✓         | ✓        | ✓              |      |          |      |      |      |      |      |        |      | ✓    |      |      |      |        |          |      |      |      |      |      |      | 1748.84        |
| ✓         | ✓        | ✓              |      |          |      |      |      |      |      |        |      |      | ✓    |      |      |        |          |      |      |      |      |      |      | 1748.20        |
| ✓         | ✓        | ✓              |      |          |      |      |      |      |      |        |      |      |      | ✓    |      |        |          |      |      |      |      |      |      | 1750.55        |
| ✓         | ✓        | ✓              |      |          |      |      |      |      |      |        |      |      |      |      | ✓    |        |          |      |      |      |      |      |      | 1744.60        |
| ✓         | ✓        | ✓              |      |          |      |      |      |      |      |        |      |      |      |      |      | ✓      |          |      |      |      |      |      |      | 1782.22        |
| ✓         | ✓        | ✓              |      |          |      |      |      |      |      |        |      |      |      |      |      |        | ✓        |      |      |      |      |      |      | 1802.69        |
| ✓         | ✓        | ✓              |      |          |      |      |      |      |      |        |      |      |      |      |      |        |          | ✓    |      |      |      |      |      | 1802.02        |
| ✓         | ✓        | ✓              |      |          |      |      |      |      |      |        |      |      |      |      |      |        |          |      | ✓    |      |      |      |      | 1801.02        |
| ✓         | ✓        | ✓              |      |          |      |      |      |      |      |        |      |      |      |      |      |        |          |      |      | ✓    |      |      |      | 1804.84        |
| ✓         | ✓        | ✓              |      |          |      |      |      |      |      |        |      |      |      |      |      |        |          |      |      |      | ✓    |      |      | 1804.05        |
| ✓         | ✓        | ✓              |      |          |      |      |      |      |      |        |      |      |      |      |      |        |          |      |      |      |      | ✓    |      | 1803.65        |
| ✓         | ✓        | ✓              |      |          |      |      |      |      |      |        | ✓    |      |      |      |      |        |          |      |      |      |      |      |      | 1748.11        |
| ✓         | ✓        | ✓              |      |          |      |      |      |      |      |        |      | ✓    |      |      |      |        |          |      |      |      |      |      |      | 1742.74        |
| ✓         | ✓        | ✓              |      |          |      |      |      |      |      |        |      |      | ✓    |      |      |        |          |      |      |      |      |      |      | 1738.94        |
| ✓         | ✓        | ✓              |      |          |      |      |      |      |      |        |      |      |      | ✓    |      |        |          |      |      |      |      |      |      | 1733.37        |
| ✓         | ✓        | ✓              |      |          |      |      |      |      |      |        |      |      |      |      | ✓    |        |          |      |      |      |      |      |      | 1738.36        |
| ✓         | ✓        | ✓              |      |          |      |      |      |      |      |        |      |      |      |      |      | ✓      |          |      |      |      |      |      |      | 1730.78        |
| <b>✓</b>  | <b>✓</b> | <b>✓</b>       |      |          |      |      |      |      |      |        |      |      |      |      |      |        |          |      |      |      |      |      |      | <b>1727.81</b> |
| ✓         | ✓        | ✓              |      |          |      |      |      |      |      |        |      |      |      |      |      |        |          |      |      |      |      |      |      | 1729.69        |
| ✓         | ✓        | ✓              |      |          |      |      |      |      |      |        |      |      |      |      |      |        |          |      |      |      |      |      |      | 1730.01        |
| ✓         | ✓        | ✓              |      |          |      |      |      |      |      |        |      |      |      |      |      |        |          |      |      |      |      |      |      | 1728.60        |
| ✓         | ✓        | ✓              |      |          |      |      |      |      |      |        |      |      |      |      |      |        |          |      |      |      |      |      |      | 1731.70        |
| ✓         | ✓        | ✓              |      |          |      |      |      |      |      |        |      |      |      |      |      |        |          |      |      |      |      |      | ✓    | 1730.45        |
| ✓         | ✓        | ✓              |      |          |      |      |      |      |      |        |      |      |      |      |      |        |          |      |      |      |      |      | ✓    | 1731.31        |

*Month* represents a categorical variable indicating month. *ns(.)* means natural cubic spline function of a variable. TPWAD represents the time point within a day. *Temp*, *RH*, and *Wind* represent temperature, relative humidity, and wind speed, respectively. *df* means degree of freedom. *d\_or\_n* represents whether the time point is in the daytime or at nighttime.

*Note.* The final model was in bold.

**Table S7c. Values of the Watanabe-Akaike information criterion (WAIC) for models used for the assessment of potential influential factors (with illuminance) of female *Ae. albopictus* for the period June-July 2018.**

| Intercept | Month | ns(TPWAD, df=6) | Included terms |      |      |      |      |      |          |      |      |      |      |   | WAIC |                |
|-----------|-------|-----------------|----------------|------|------|------|------|------|----------|------|------|------|------|---|------|----------------|
|           |       |                 | ns(log(Illum)) |      |      |      |      |      | ns(Wind) |      |      |      |      |   |      |                |
|           |       |                 | df=2           | df=3 | df=4 | df=5 | df=6 | df=1 | df=2     | df=3 | df=4 | df=5 | df=6 |   |      |                |
| ✓         | ✓     | ✓               | ✓              |      |      |      |      |      |          |      |      |      |      |   |      | <b>1978.57</b> |
| ✓         | ✓     | ✓               |                | ✓    |      |      |      |      |          |      |      |      |      |   |      | 1975.06        |
| ✓         | ✓     | ✓               |                |      | ✓    |      |      |      |          |      |      |      |      |   |      | 1976.67        |
| ✓         | ✓     | ✓               |                |      |      | ✓    |      |      |          |      |      |      |      |   |      | 1978.12        |
| ✓         | ✓     | ✓               |                |      |      |      | ✓    |      |          |      |      |      |      |   |      | 1979.31        |
| ✓         | ✓     | ✓               | ✓              |      |      |      |      |      | ✓        |      |      |      |      |   |      | 1980.82        |
| ✓         | ✓     | ✓               | ✓              |      |      |      |      |      |          | ✓    |      |      |      |   |      | 1983.16        |
| ✓         | ✓     | ✓               | ✓              |      |      |      |      |      |          |      | ✓    |      |      |   |      | 1980.36        |
| ✓         | ✓     | ✓               | ✓              |      |      |      |      |      |          |      |      | ✓    |      |   |      | 1984.85        |
| ✓         | ✓     | ✓               | ✓              |      |      |      |      |      |          |      |      |      | ✓    |   |      | 1980.83        |
| ✓         | ✓     | ✓               | ✓              |      |      |      |      |      |          |      |      |      |      | ✓ |      | 1981.30        |

Month represents a categorical variable indicating month. ns(.) means natural cubic spline function of a variable. TPWAD represents the time point within a day. df means degree of freedom. log(Illum+0.001) means the log-transformation of (Illum + 0.001).

Note. The final model was in bold.

**Table S7d. Values of the Watanabe-Akaike information criterion (WAIC) for models used for the assessment of potential influential factors (with illuminance) of male *Ae. albopictus* for the period June-July 2018.**

| Intercept | Month | ns(TPWAD, <i>df</i> =4) | Included terms          |              |              |              |              |                   |              |              |              |              |              | WAIC |   |         |                |
|-----------|-------|-------------------------|-------------------------|--------------|--------------|--------------|--------------|-------------------|--------------|--------------|--------------|--------------|--------------|------|---|---------|----------------|
|           |       |                         | ns(log( <i>Illum</i> )) |              |              |              |              | ns( <i>Wind</i> ) |              |              |              |              |              |      |   |         |                |
|           |       |                         | <i>df</i> =2            | <i>df</i> =3 | <i>df</i> =4 | <i>df</i> =5 | <i>df</i> =6 | <i>df</i> =1      | <i>df</i> =2 | <i>df</i> =3 | <i>df</i> =4 | <i>df</i> =5 | <i>df</i> =6 |      |   |         |                |
| ✓         | ✓     | ✓                       | ✓                       |              |              |              |              |                   |              |              |              |              |              |      |   | 1793.27 |                |
| ✓         | ✓     | ✓                       |                         | ✓            |              |              |              |                   |              |              |              |              |              |      |   |         | <b>1756.29</b> |
| ✓         | ✓     | ✓                       |                         |              | ✓            |              |              |                   |              |              |              |              |              |      |   |         | 1758.95        |
| ✓         | ✓     | ✓                       |                         |              |              | ✓            |              |                   |              |              |              |              |              |      |   |         | 1760.99        |
| ✓         | ✓     | ✓                       |                         |              |              |              | ✓            |                   |              |              |              |              |              |      |   |         | 1759.68        |
| ✓         | ✓     | ✓                       |                         | ✓            |              |              |              |                   | ✓            |              |              |              |              |      |   |         | 1758.24        |
| ✓         | ✓     | ✓                       |                         | ✓            |              |              |              |                   |              | ✓            |              |              |              |      |   |         | 1759.01        |
| ✓         | ✓     | ✓                       |                         | ✓            |              |              |              |                   |              |              | ✓            |              |              |      |   |         | 1758.75        |
| ✓         | ✓     | ✓                       |                         | ✓            |              |              |              |                   |              |              |              | ✓            |              |      |   |         | 1761.31        |
| ✓         | ✓     | ✓                       |                         | ✓            |              |              |              |                   |              |              |              |              | ✓            |      |   |         | 1763.45        |
| ✓         | ✓     | ✓                       |                         | ✓            |              |              |              |                   |              |              |              |              |              |      | ✓ |         | 1760.15        |

*Month* represents a categorical variable indicating month. *ns(.)* means natural cubic spline function of a variable. TPWAD represents the time point within a day. *df* means degree of freedom.  $\log(Illum+0.001)$  means the log-transformation of (*Illum* + 0.001).

*Note.* The final model was in bold.
