# Supplementary material for: A field-based modeling study on ecological characterization of hourly host-seeking behavior and its associated climatic variables in Aedes albopictus
Source: PubMed Central journal article supplement (PMC6791010; doi:10.1186/s13071-019-3715-1), 2019-10-14
Supplement: 13071_2019_3715_MOESM11_ESM.pdf [file 13071_2019_3715_MOESM11_ESM.pdf]

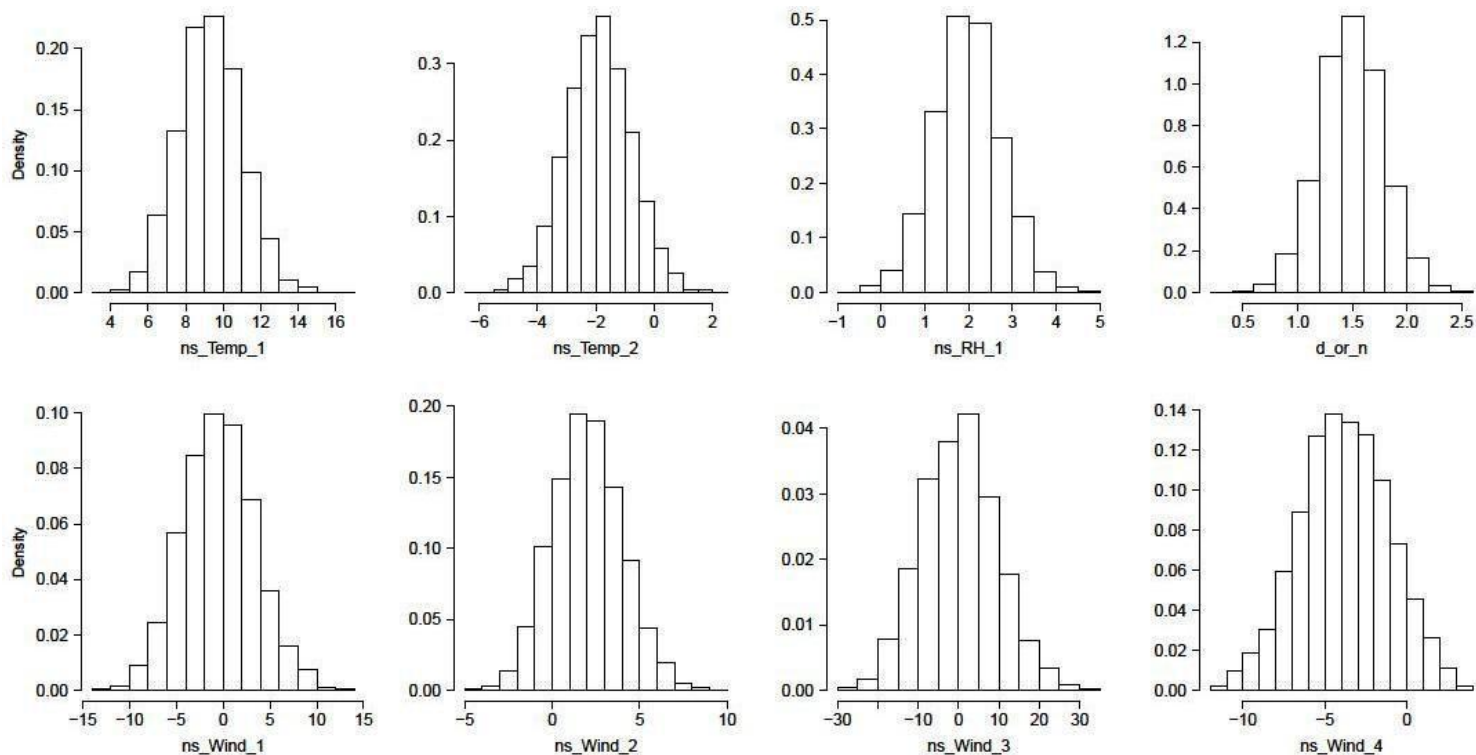

**Figure S2a. Histograms of the parameter values of temperature, relative humidity, whether the time point was in the daytime or at night, and wind speed (excluding those from warm-up iterations) in the model fitted to female mosquito densities during November 2016 to November 2017. ns\_Temp\_k (k=1, 2) indicates the term of a natural cubic spline of temperature; ns\_RH\_1 indicates the term of a natural cubic spline of relative humidity; d\_or\_n indicates whether the time point was in the daytime or at night; ns\_Wind\_k (k=1, 2, 3, 4) indicates the term of a natural cubic spline of wind speed.**

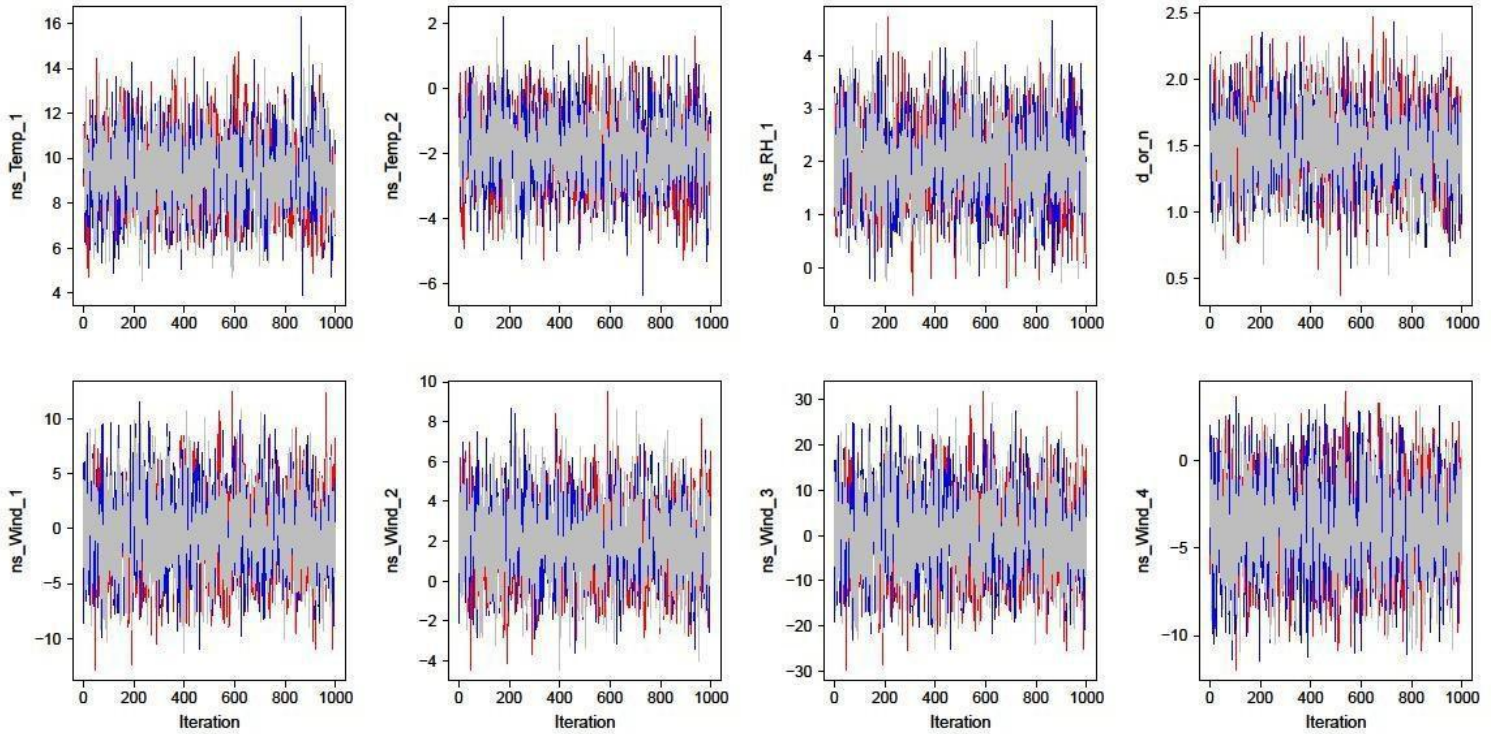

**Figure S2b.** Trace plots of the parameter values of temperature, relative humidity, whether the time point was in the daytime or at night, and wind speed (excluding those from warm-up iterations) in the model fitted to female mosquito densities during November 2016 to November 2017 from chain 1 (red lines), chain 2 (blue lines), and chain 3 (grey lines).  $ns\_Temp\_k$  ( $k=1, 2$ ) indicates the term of a natural cubic spline of temperature;  $ns\_RH\_1$  indicates the term of a natural cubic spline of relative humidity;  $d\_or\_n$  indicates whether the time point was in the daytime or at night;  $ns\_Wind\_k$  ( $k=1, 2, 3, 4$ ) indicates the term of a natural cubic spline of wind speed.

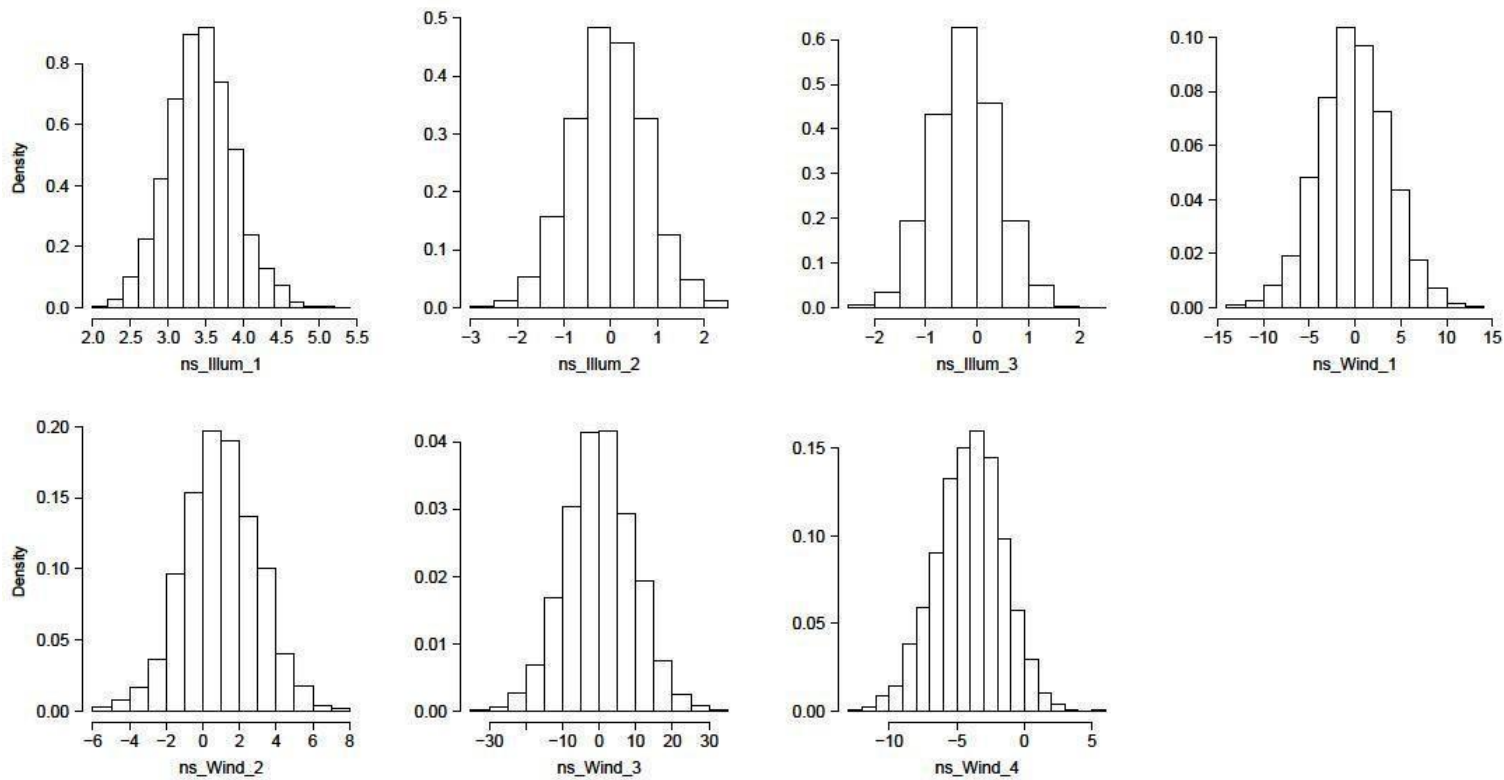

**Figure S2c. Histograms of the parameter values of illuminance and wind speed (excluding those from warm-up iterations) in the model fitted to female mosquito densities during November 2016 to November 2017. `ns_Illum_k` ( $k=1, 2, 3$ ) indicates the term of a natural cubic spline of illuminance; `ns_Wind_k` ( $k=1, 2, 3, 4$ ) indicates the term of a natural cubic spline of wind speed.**

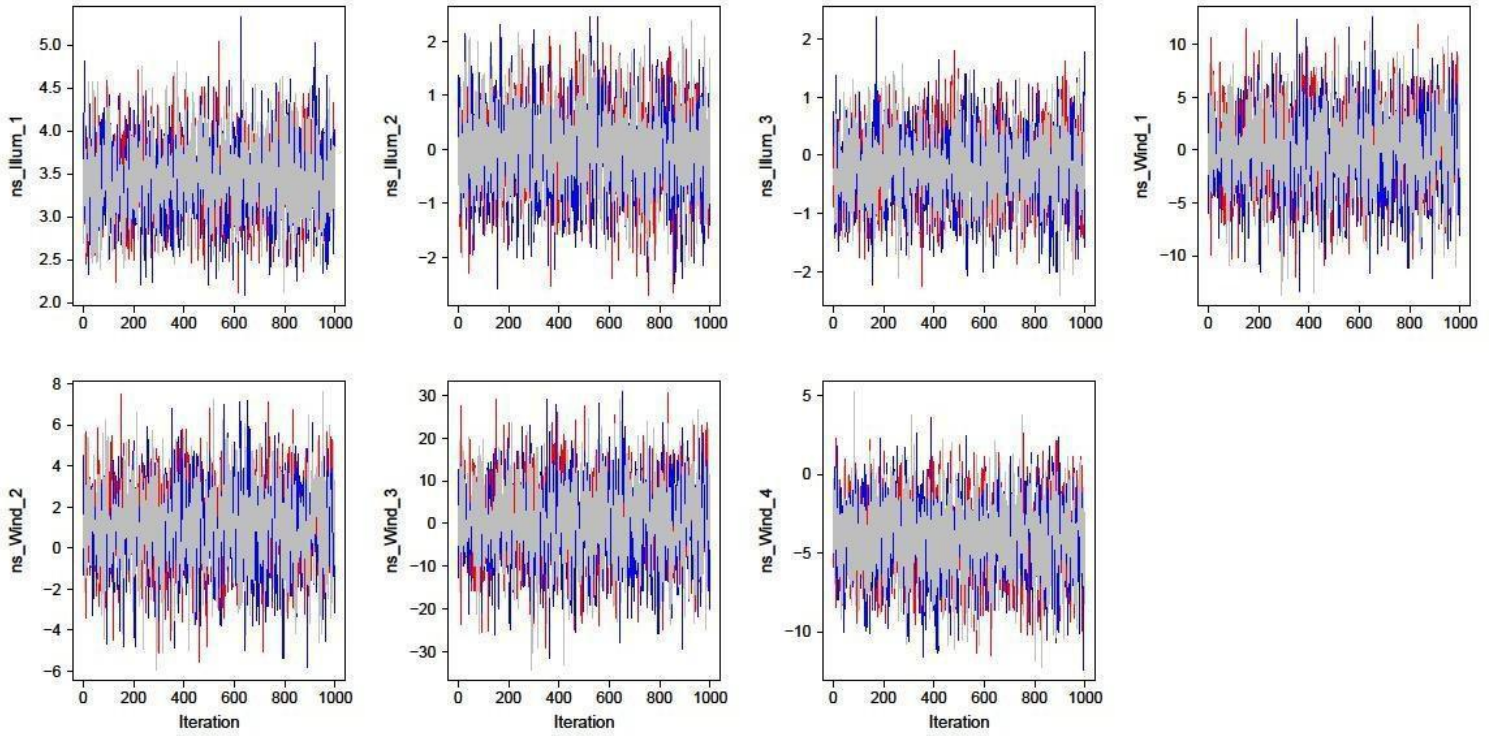

**Figure S2d.** Trace plots of the parameter values of illuminance and wind speed (excluding those from warm-up iterations) in the model fitted to female mosquito densities during November 2016 to November 2017 from chain 1 (red lines), chain 2 (blue lines), and chain 3 (grey lines).  $ns\_Illum\_k$  ( $k=1, 2, 3$ ) indicates the term of a natural cubic spline of illuminance;  $ns\_Wind\_k$  ( $k=1, 2, 3, 4$ ) indicates the term of a natural cubic spline of wind speed.

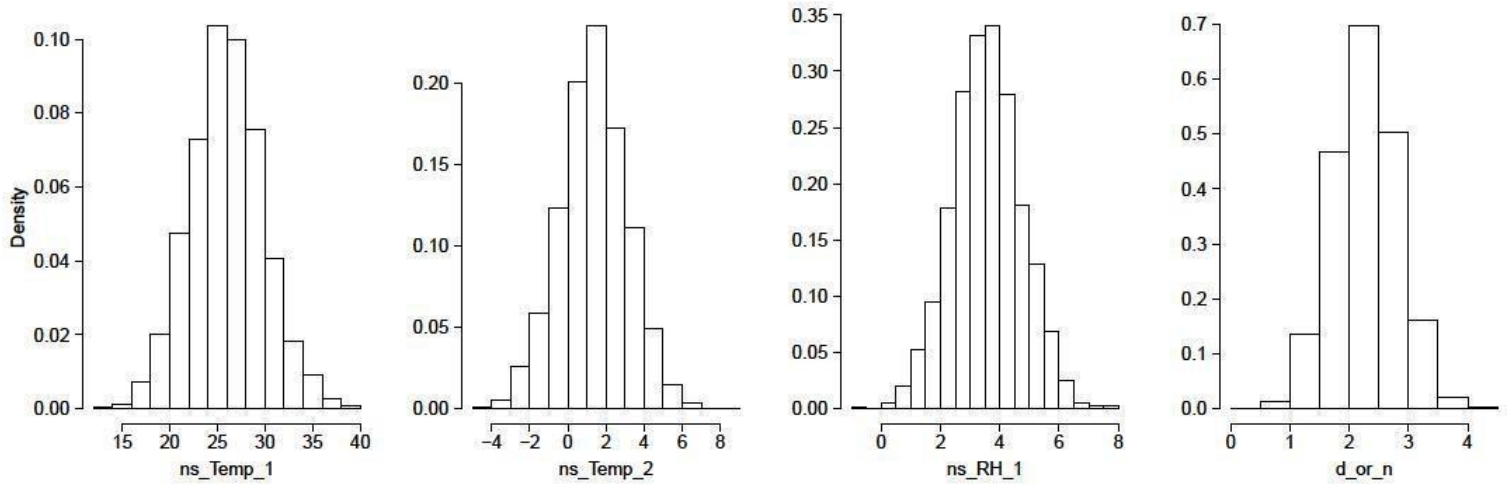

**Figure S2e. Histograms of the parameter values of temperature, relative humidity, and whether the time point was in the daytime or at night (excluding those from warm-up iterations) in the model fitted to male mosquito densities during November 2016 to November 2017.** ns\_Temp\_k (k=1, 2) indicates the term of a natural cubic spline of temperature; ns\_RH\_1 indicates the term of a natural cubic spline of relative humidity; d\_or\_n indicates whether the time point was in the daytime or at night.

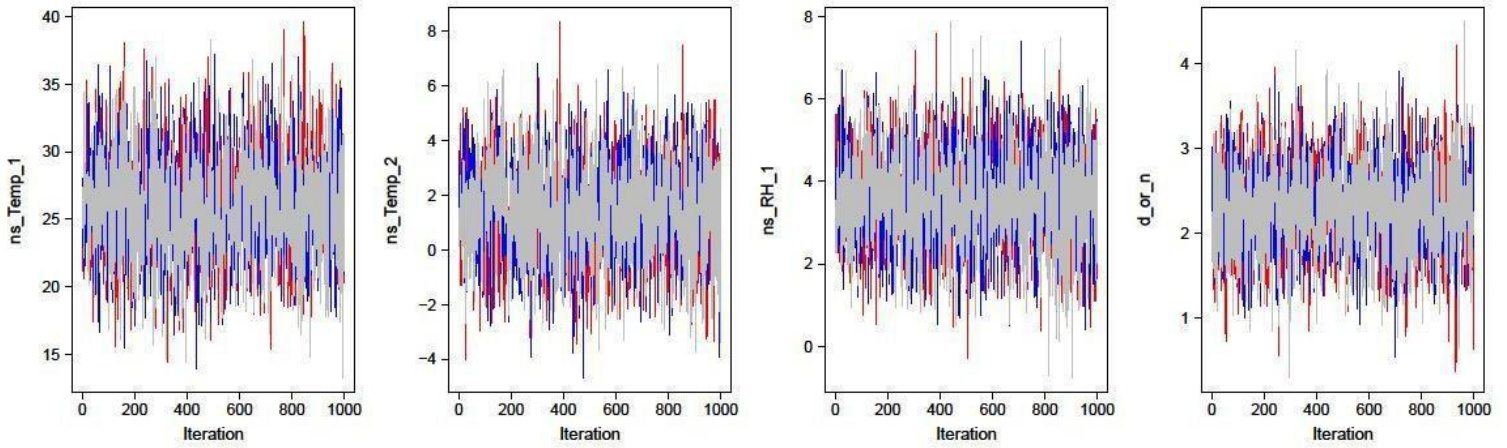

**Figure S2f.** Trace plots of the parameter values of temperature, relative humidity, and whether the time point was in the daytime or at night (excluding those from warm-up iterations) in the model fitted to male mosquito densities during November 2016 to November 2017 from chain 1 (red lines), chain 2 (blue lines), and chain 3 (grey lines).  $ns\_Temp\_k$  ( $k=1, 2$ ) indicates the term of a natural cubic spline of temperature;  $ns\_RH\_1$  indicates the term of a natural cubic spline of relative humidity;  $d\_or\_n$  indicates whether the time point was in the daytime or at night.

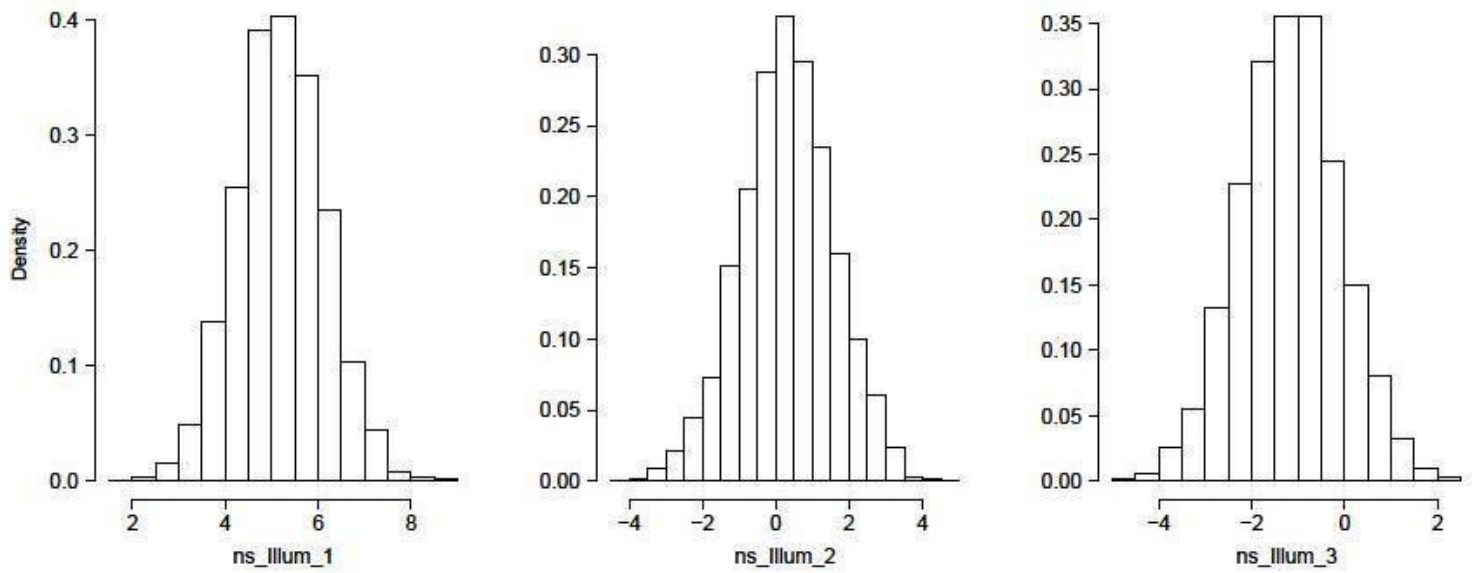

**Figure S2g. Histograms of the parameter values of illuminance (excluding those from warm-up iterations) in the model fitted to male mosquito densities during November 2016 to November 2017. ns\_Illum\_k (k=1, 2, 3) indicates the term of a natural cubic spline of illuminance.**

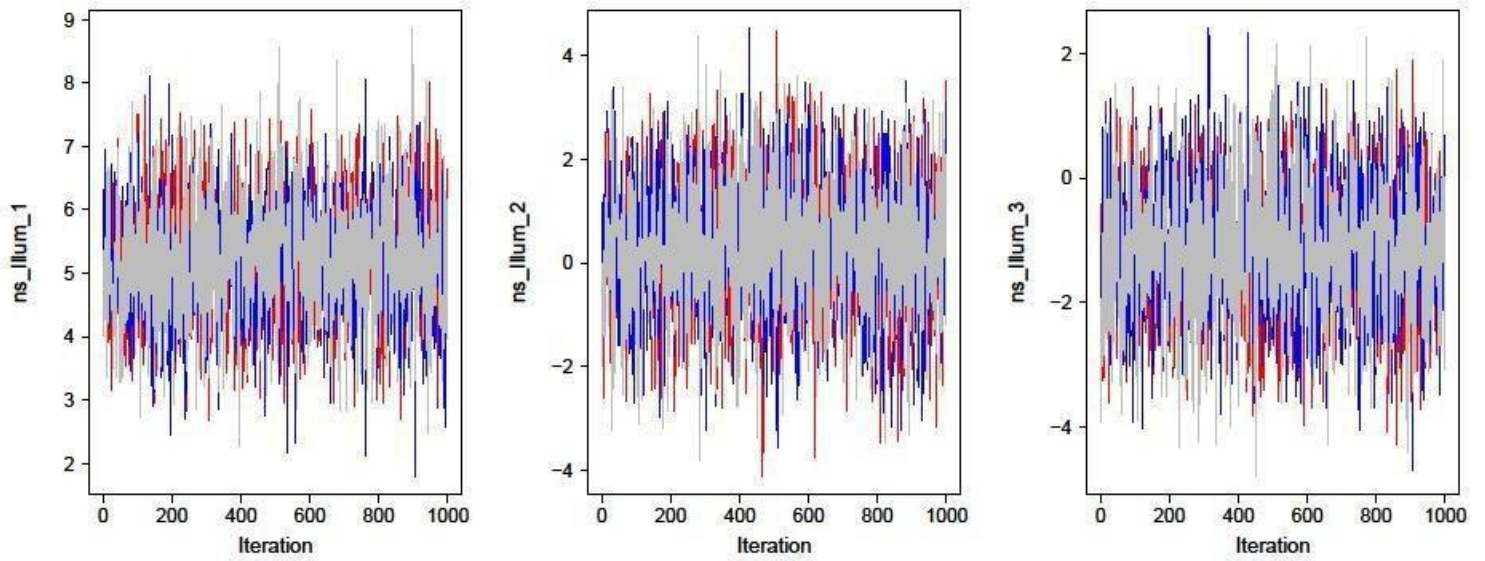

**Figure S2h.** Trace plots of the parameter values of illuminance (excluding those from warm-up iterations) in the model fitted to male mosquito densities during November 2016 to November 2017 from chain 1 (red lines), chain 2 (blue lines), and chain 3 (grey lines).  $ns\_illum\_k$  ( $k=1, 2, 3$ ) indicates the term of a natural cubic spline of illuminance.



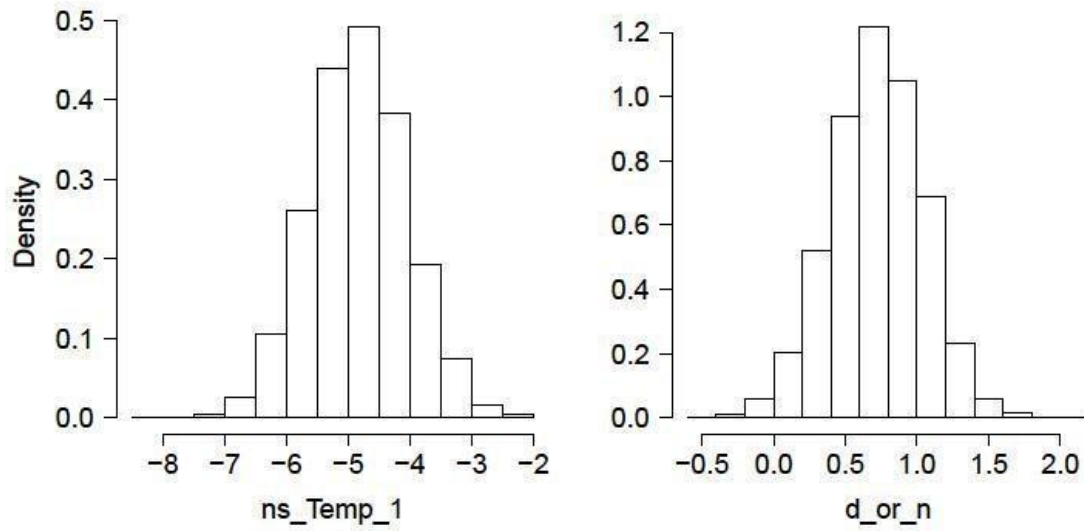

**Figure S2i.** Histograms of the parameter values of temperature and whether the time point was in the daytime or at night (excluding those from warm-up iterations) in the model fitted to female mosquito densities during **June-July 2018**. `ns_Temp_1` indicates the term of a natural cubic spline of temperature; `d_or_n` indicates whether the time point was in the daytime or at night.

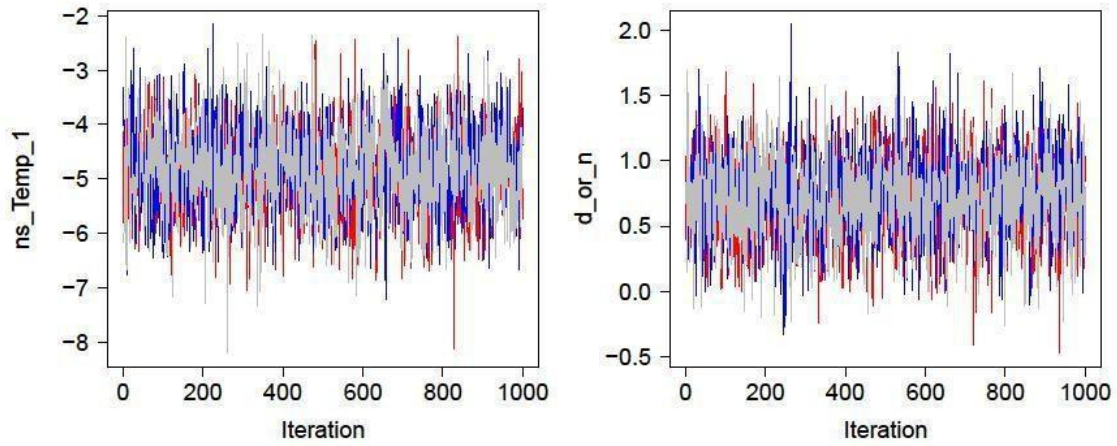

**Figure S2j.** Trace plots of the parameter values of temperature and whether the time point was in the daytime or at night (excluding those from warm-up iterations) in the model fitted to female mosquito densities during June-July 2018 from chain 1 (red lines), chain 2 (blue lines), and chain 3 (grey lines). `ns_Temp_1` indicates the term of a natural cubic spline of temperature; `d_or_n` indicates whether the time point was in the daytime or at night.

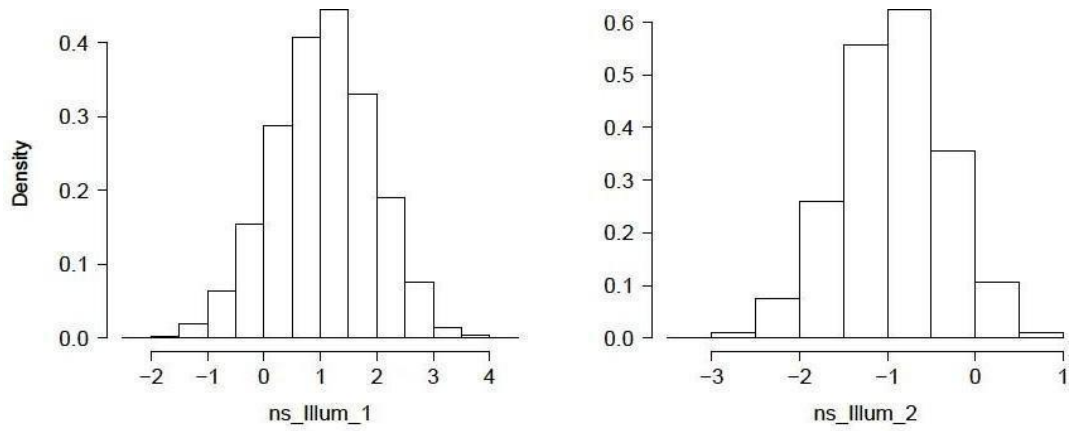

**Figure S2k. Histograms of the parameter values of illuminance (excluding those from warm-up iterations) in the model fitted to female mosquito densities during June-July 2018. ns\_illum\_k (k=1, 2) indicates the term of a natural cubic spline of illuminance.**

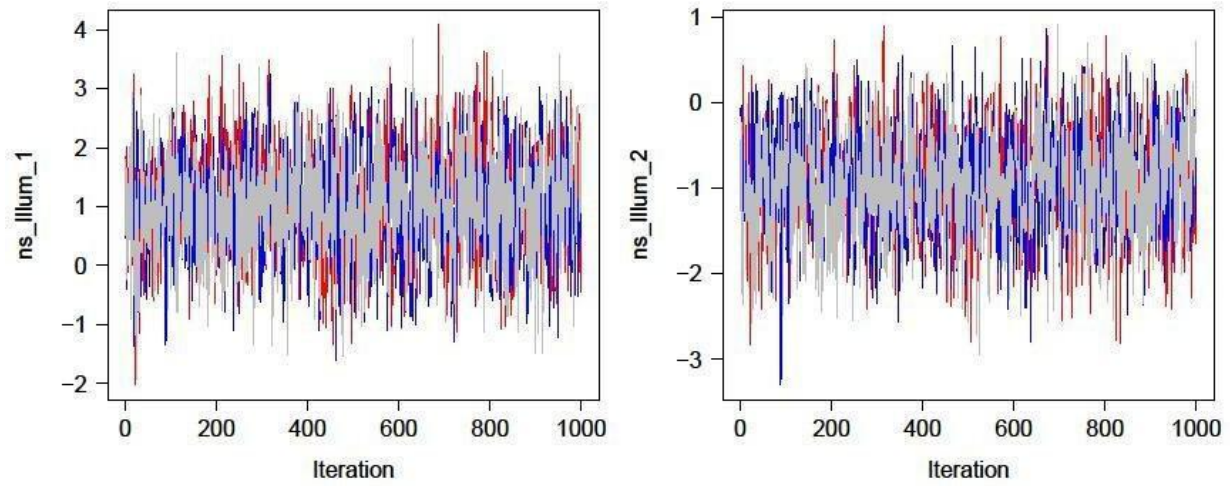

**Figure S21.** Trace plots of the parameter values of illuminance (excluding those from warm-up iterations) in the model fitted to female mosquito densities during June-July 2018 from chain 1 (red lines), chain 2 (blue lines), and chain 3 (grey lines).  $ns\_Illum\_k$  ( $k=1, 2$ ) indicates the term of a natural cubic spline of illuminance.

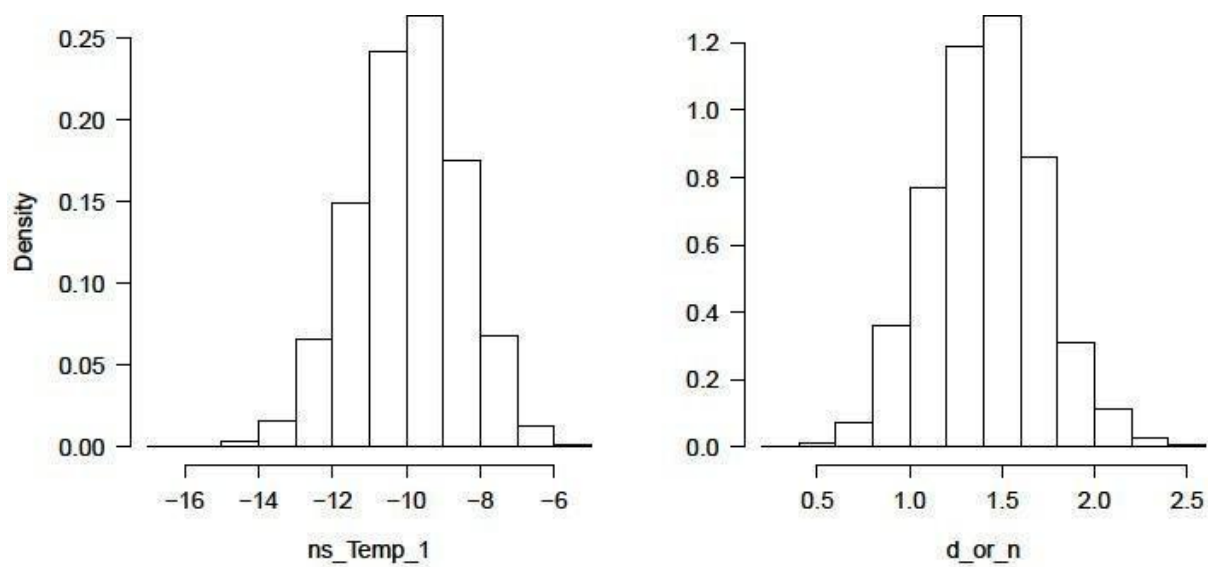

**Figure S2m. Histograms of the parameter values of temperature and whether the time point was in the daytime or at night (excluding those from warm-up iterations) in the model fitted to male mosquito densities during June-July 2018.** `ns_Temp_1` indicates the term of a natural cubic spline of temperature; `d_or_n` indicates whether the time point was in the daytime or at night.

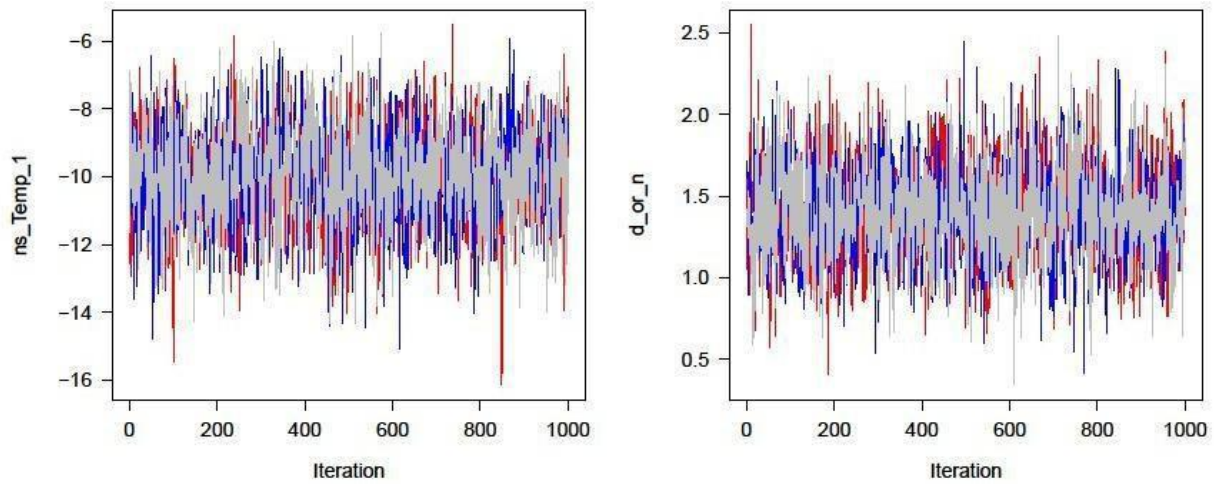

**Figure S2n.** Trace plots of the parameter values of temperature and whether the time point was in the daytime or at night (excluding those from warm-up iterations) in the model fitted to male mosquito densities during June-July 2018 from chain 1 (red lines), chain 2 (blue lines), and chain 3 (grey lines). `ns_Temp_1` indicates the term of a natural cubic spline of temperature; `d_or_n` indicates whether the time point was in the daytime or at night.

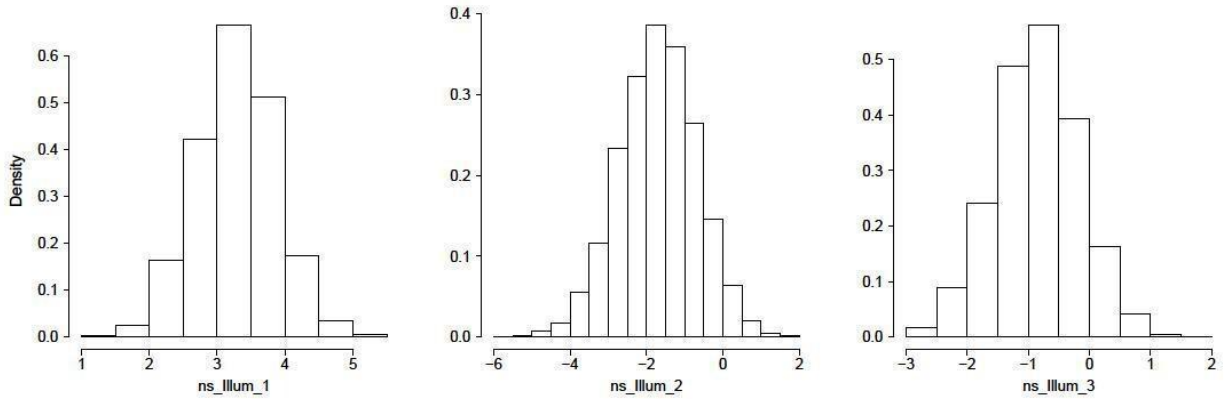

**Figure S2o. Histograms of the parameter values of illuminance (excluding those from warm-up iterations) in the model fitted to male mosquito densities during June-July 2018. ns\_illum\_k (k=1, 2, 3) indicates the term of a natural cubic spline of illuminance.**

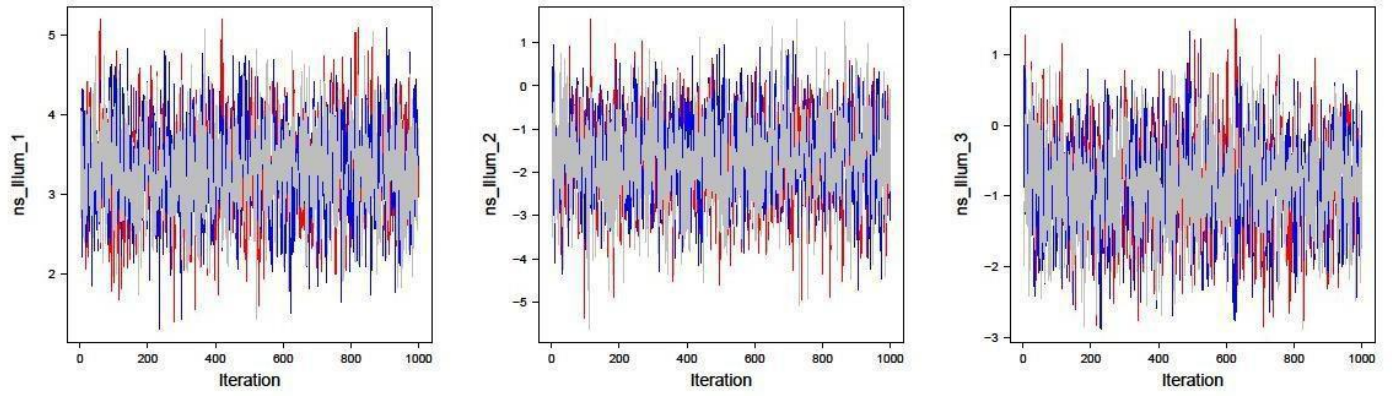

**Figure S2p.** Trace plots of the parameter values of illuminance (excluding those from warm-up iterations) in the model fitted to male mosquito densities during June-July 2018 from chain 1 (red lines), chain 2 (blue lines), and chain 3 (grey lines).  $ns\_illum\_k$  ( $k=1, 2, 3$ ) indicates the term of a natural cubic spline of illuminance.
