# Supplementary material for: A field-based modeling study on ecological characterization of hourly host-seeking behavior and its associated climatic variables in Aedes albopictus
Source: PubMed Central journal article supplement (PMC6791010; doi:10.1186/s13071-019-3715-1), 2019-10-14
Supplement: 13071_2019_3715_MOESM12_ESM.pdf [file 13071_2019_3715_MOESM12_ESM.pdf]

**Table S8. Estimated thresholds of temperatures that corresponded to the predicted *Ae. albopictus* densities which were  $\geq 1$  per person per hour from multi-month investigations from November 2016 to November 2017**

| Month     | Female                |                        | Male                  |                        |
|-----------|-----------------------|------------------------|-----------------------|------------------------|
|           | Low threshold<br>(°C) | High threshold<br>(°C) | Low threshold<br>(°C) | High threshold<br>(°C) |
| January   | None                  | None                   | (24.2, 26.8)          | None                   |
| February  | (25.8, 26.3)          | 27.5                   | None                  | None                   |
| March     | (17.9, 21.8)          | None                   | None                  | None                   |
| April     | (16.4, 26.4)          | (26.9, 30.5)           | (21.7, 28.2)          | (28.8, 30.5)           |
| May       | (23.4, 26.0)          | (26.6, 31.2)           | (23.4, 28.2)          | (28.8, 31.2)           |
| June      | (26.2, 26.4)          | (26.6, 36.1)           | (26.2, 27.9)          | (29.4, 37.1)           |
| July      | (25.1, 26.4)          | (26.8, 33.9)           | (25.1, 28.4)          | (28.5, 33.9)           |
| August    | None                  | (26.9, 35.5)           | (26.9, 27.9)          | (29.3, 35.9)           |
| September | (26.2, 26.5)          | (26.6, 37.1)           | (26.2, 28.4)          | (28.6, 34.4)           |
| October   | (25.8, 26.4)          | (26.6, 36.8)           | (25.8, 28.1)          | (28.8, 35.8)           |
| November  | (20.2, 26.2)          | (26.7, 31.9)           | (22.3, 28.3)          | (28.6, 31.9)           |
| December  | None                  | None                   | 27.8                  | None                   |
